# Supplementary material for: Moment of Bentonite Addition, Co-Addition of Tannins, and Bentonite Type Affect the Differential Affinity of Pathogenesis-Related Grape Proteins towards Bentonite during Fermentation
Source: MDPI journal article supplement (doi:10.3390/foods9111534), 2020-10-25
Supplement: s1 [file s1]

**Table S1.** Reduction of the concentrations of proteins in Malvazija istarska wines (mean  $\pm$  standard deviation; n = 3; %) obtained after partial fining with bentonite at different points of fermentation and in final protein stable wines.

| Protein                           | Stage   | Treatment           |                     |                     |                     |                     |
|-----------------------------------|---------|---------------------|---------------------|---------------------|---------------------|---------------------|
|                                   |         | CO                  | JU                  | BE                  | MD                  | EN                  |
| <i>RP-HPLC</i>                    |         |                     |                     |                     |                     |                     |
| TL1                               | A Ferm  |                     | 52.17 $\pm$ 6.97    | 47.82 $\pm$ 20.75   | 56.08 $\pm$ 6.46    | 67.96 $\pm$ 8.96    |
|                                   | ProStab | 97.48 $\pm$ 0.76    | 97.13 $\pm$ 0.53    | 97.41 $\pm$ 1.09    | 97.93 $\pm$ 1.08    | 95.80 $\pm$ 1.49    |
| TL2                               | A Ferm  |                     | 32.27 $\pm$ 2.85 b  | 33.56 $\pm$ 6.96 b  | 35.23 $\pm$ 2.05 b  | 52.52 $\pm$ 10.34 a |
|                                   | ProStab | 85.85 $\pm$ 3.37 a  | 89.53 $\pm$ 3.30 a  | 89.95 $\pm$ 0.90 a  | 89.50 $\pm$ 0.65 a  | 76.69 $\pm$ 7.34 b  |
| TL3                               | A Ferm  |                     | 21.75 $\pm$ 4.45    | 18.90 $\pm$ 13.56   | 14.44 $\pm$ 5.01    | 32.41 $\pm$ 16.37   |
|                                   | ProStab | 64.05 $\pm$ 8.04 b  | 84.25 $\pm$ 5.57 a  | 83.85 $\pm$ 0.36 a  | 83.22 $\pm$ 2.69 a  | 65.6 $\pm$ 11.46 b  |
| TL4                               | A Ferm  |                     | 58.87 $\pm$ 5.24 c  | 60.91 $\pm$ 6.09 c  | 87.69 $\pm$ 2.15 b  | 96.61 $\pm$ 1.49 a  |
|                                   | ProStab | 98.57 $\pm$ 0.91 a  | 97.41 $\pm$ 0.23 a  | 97.80 $\pm$ 0.40 a  | 89.89 $\pm$ 3.40 a  | 59.86 $\pm$ 23.03 b |
| CHI1                              | A Ferm  |                     | 48.27 $\pm$ 13.29   | 43.34 $\pm$ 16.77   | 44.55 $\pm$ 9.23    | 55.58 $\pm$ 8.27    |
|                                   | ProStab | 98.7 $\pm$ 0.09     | 98.34 $\pm$ 0.31    | 97.78 $\pm$ 0.69    | 97.72 $\pm$ 0.36    | 97.38 $\pm$ 0.49    |
| CHI2                              | A Ferm  |                     | 47.78 $\pm$ 11.36   | 47.03 $\pm$ 15.49   | 48.86 $\pm$ 9.20    | 61.87 $\pm$ 8.46    |
|                                   | ProStab | 99.71 $\pm$ 0.04    | 99.38 $\pm$ 0.18    | 99.47 $\pm$ 0.19    | 99.41 $\pm$ 0.18    | 99.23 $\pm$ 0.26    |
| total TL                          | A Ferm  |                     | 48.61 $\pm$ 3.91 c  | 47.86 $\pm$ 6.91 c  | 61.36 $\pm$ 2.26 b  | 73.48 $\pm$ 6.76 a  |
|                                   | ProStab | 92.39 $\pm$ 2.15 a  | 93.47 $\pm$ 1.95 a  | 93.71 $\pm$ 1.54 a  | 91.13 $\pm$ 1.64 a  | 80.29 $\pm$ 6.69 b  |
| total CHI                         | A Ferm  |                     | 48.06 $\pm$ 12.45   | 44.95 $\pm$ 16.20   | 46.43 $\pm$ 9.20    | 58.33 $\pm$ 8.33    |
|                                   | ProStab | 99.15 $\pm$ 0.03    | 98.79 $\pm$ 0.17    | 98.49 $\pm$ 0.49    | 98.43 $\pm$ 0.25    | 98.11 $\pm$ 0.42    |
| total                             | A Ferm  |                     | 48.37 $\pm$ 7.29    | 46.57 $\pm$ 10.85   | 54.74 $\pm$ 5.34    | 66.76 $\pm$ 7.27    |
|                                   | ProStab | 95.37 $\pm$ 1.32 a  | 95.77 $\pm$ 1.31 a  | 95.83 $\pm$ 1.24 a  | 94.92 $\pm$ 1.11 a  | 90.34 $\pm$ 2.70 b  |
| total TL / total CHI <sup>1</sup> | A Ferm  |                     | 1.05 $\pm$ 0.25     | 1.14 $\pm$ 0.32     | 1.35 $\pm$ 0.20     | 1.27 $\pm$ 0.10     |
|                                   | ProStab | 0.93 $\pm$ 0.02 a   | 0.95 $\pm$ 0.02 a   | 0.95 $\pm$ 0.01 a   | 0.93 $\pm$ 0.01 a   | 0.82 $\pm$ 0.06 b   |
| <i>SE-HPLC</i>                    |         |                     |                     |                     |                     |                     |
| P93                               | A Ferm  |                     | 26.63 $\pm$ 0.83    | 25.06 $\pm$ 7.74    | 18.62 $\pm$ 7.39    | 13.75 $\pm$ 4.78    |
|                                   | ProStab | 20.68 $\pm$ 7.31 a  | 6.06 $\pm$ 4.25 b   | 4.59 $\pm$ 1.95 b   | 12.96 $\pm$ 3.54 ab | 6.28 $\pm$ 6.24 b   |
| P67                               | A Ferm  |                     | 44.36 $\pm$ 6.95    | 54.98 $\pm$ 7.36    | 46.11 $\pm$ 2.92    | 53.85 $\pm$ 8.49    |
|                                   | ProStab | 100.00 $\pm$ 0.00   | 100.00 $\pm$ 0.00   | 100.00 $\pm$ 0.00   | 100.00 $\pm$ 0.00   | 100.00 $\pm$ 0.00   |
| PR32                              | A Ferm  |                     | 100.00 $\pm$ 0.00   | 100.00 $\pm$ 0.00   | 100.00 $\pm$ 0.00   | 100.00 $\pm$ 0.00   |
|                                   | ProStab | 100.00 $\pm$ 0.00   | -                   | -                   | -                   | -                   |
| PR25                              | A Ferm  |                     | 47.47 $\pm$ 4.63    | 54.48 $\pm$ 0.45    | 52.70 $\pm$ 1.44    | 55.46 $\pm$ 7.07    |
|                                   | ProStab | 88.49 $\pm$ 3.72 c  | 95.74 $\pm$ 1.87 a  | 95.19 $\pm$ 0.33 ab | 95.83 $\pm$ 1.03 a  | 91.32 $\pm$ 1.87 bc |
| PR23                              | A Ferm  |                     | 31.21 $\pm$ 6.40 c  | 46.19 $\pm$ 0.54 ab | 41.33 $\pm$ 0.70 bc | 51.89 $\pm$ 7.73 a  |
|                                   | ProStab | 89.65 $\pm$ 4.07 b  | 96.61 $\pm$ 2.02 a  | 96.75 $\pm$ 0.05 a  | 96.72 $\pm$ 0.90 a  | 90.50 $\pm$ 2.56 b  |
| PR22                              | A Ferm  |                     | 58.50 $\pm$ 5.08 c  | 61.38 $\pm$ 4.78 c  | 73.82 $\pm$ 2.04 b  | 84.90 $\pm$ 2.83 a  |
|                                   | ProStab | 93.94 $\pm$ 2.24 a  | 96.44 $\pm$ 1.75 a  | 95.97 $\pm$ 0.43 a  | 95.11 $\pm$ 1.58 a  | 85.87 $\pm$ 1.91 b  |
| PR20                              | A Ferm  |                     | 53.55 $\pm$ 0.73 c  | 58.37 $\pm$ 1.90 c  | 67.79 $\pm$ 4.39 b  | 74.34 $\pm$ 2.05 a  |
|                                   | ProStab | 84.80 $\pm$ 0.69 a  | 79.38 $\pm$ 0.78 ab | 74.84 $\pm$ 3.44 bc | 74.74 $\pm$ 3.26 bc | 69.89 $\pm$ 4.44 c  |
| total PR                          | A Ferm  |                     | 48.99 $\pm$ 3.62 c  | 55.85 $\pm$ 1.40 bc | 59.01 $\pm$ 0.82 b  | 65.71 $\pm$ 5.08 a  |
|                                   | ProStab | 89.47 $\pm$ 2.61 ab | 93.46 $\pm$ 1.81 a  | 92.30 $\pm$ 0.47 a  | 93.04 $\pm$ 1.29 a  | 87.71 $\pm$ 2.48 b  |

CO – control wine without bentonite in fermentation, JU – initial granular sodium-activated bentonite dose (100 g/hL) added into clear juice, BE – initial granular sodium-activated bentonite dose (100 g/hL) added at the beginning of fermentation, MD – initial granular sodium-activated bentonite dose (100 g/hL) added in the middle of fermentation, EN – initial granular sodium-activated bentonite dose (100 g/hL) added near the end of fermentation. AFerm – wines analyzed after fermentation, ProStab – wines analyzed after total protein stabilization by additional post-fermentation fining with granular sodium-activated bentonite. AFerm reductions were calculated in relation to CO wine and ProStab reductions in relation to corresponding AFerm wines. Different lowercase letters in a row represent statistically significant differences among treatments, at  $p < 0.05$  obtained by one-way ANOVA and LSD test. <sup>1</sup> ratio of % values.

**Table S2.** Reduction of the concentrations of proteins in Malvazija istarska wines (mean  $\pm$  standard deviation; n = 3; %) obtained after partial fining with bentonite and/or the addition of commercial enological tannin preparation during fermentation, and in final protein stable wines.

| Protein                           | Stage   | Treatment           |                     |                     |                     |
|-----------------------------------|---------|---------------------|---------------------|---------------------|---------------------|
|                                   |         | CO                  | GSAB                | ET                  | GSAB + ET           |
| <i>RP-HPLC</i>                    |         |                     |                     |                     |                     |
| TL1                               | AFerm   |                     | 78.20 $\pm$ 4.49 a  | 23.82 $\pm$ 9.19 b  | 89.51 $\pm$ 3.51 a  |
|                                   | ProStab | 96.04 $\pm$ 4.98    | 88.48 $\pm$ 8.88    | 95.21 $\pm$ 3.20    | 92.43 $\pm$ 2.89    |
| TL2                               | AFerm   |                     | 60.50 $\pm$ 2.95 a  | 18.26 $\pm$ 8.16 b  | 71.36 $\pm$ 6.65 a  |
|                                   | ProStab | 86.09 $\pm$ 5.95 a  | 65.81 $\pm$ 6.45 b  | 85.25 $\pm$ 1.31 a  | 56.34 $\pm$ 10.88 b |
| TL3                               | AFerm   |                     | 31.10 $\pm$ 1.83    | 11.27 $\pm$ 14.76   | 30.02 $\pm$ 9.68    |
|                                   | ProStab | 72.18 $\pm$ 8.23 a  | 49.08 $\pm$ 7.62 b  | 71.23 $\pm$ 7.18 a  | 56.14 $\pm$ 7.82 b  |
| TL4                               | AFerm   |                     | 97.59 $\pm$ 1.77 a  | 19.90 $\pm$ 5.59 b  | 99.04 $\pm$ 0.62 a  |
|                                   | ProStab | 97.53 $\pm$ 2.93    | 100.00 $\pm$ 0.00   | 95.06 $\pm$ 3.53    | 89.07 $\pm$ 18.93   |
| CHI1                              | AFerm   |                     | 52.45 $\pm$ 5.93 a  | 5.40 $\pm$ 15.22 b  | 71.37 $\pm$ 3.46 a  |
|                                   | ProStab | 90.13 $\pm$ 7.33    | 73.45 $\pm$ 9.64    | 88.65 $\pm$ 5.73    | 80.05 $\pm$ 7.93    |
| CHI2                              | AFerm   |                     | 54.08 $\pm$ 7.16 a  | -0.56 $\pm$ 16.86 b | 72.82 $\pm$ 2.98 a  |
|                                   | ProStab | 90.80 $\pm$ 5.86 a  | 70.99 $\pm$ 7.17 b  | 88.34 $\pm$ 4.86 a  | 79.11 $\pm$ 7.57 ab |
| total TL                          | AFerm   |                     | 74.90 $\pm$ 2.83 b  | 19.97 $\pm$ 3.26 c  | 81.25 $\pm$ 3.37 a  |
|                                   | ProStab | 91.58 $\pm$ 5.06 ab | 67.86 $\pm$ 5.65    | 89.97 $\pm$ 2.18 ab | 64.82 $\pm$ 5.69 b  |
| total CHI                         | AFerm   |                     | 53.20 $\pm$ 6.48 a  | 2.65 $\pm$ 15.97 b  | 72.04 $\pm$ 3.12 a  |
|                                   | ProStab | 90.44 $\pm$ 6.65 a  | 72.35 $\pm$ 8.55 b  | 88.50 $\pm$ 5.26 a  | 79.60 $\pm$ 7.61 ab |
| total                             | AFerm   |                     | 65.90 $\pm$ 4.29 b  | 12.78 $\pm$ 6.94 c  | 77.43 $\pm$ 3.19 a  |
|                                   | ProStab | 91.10 $\pm$ 5.72 a  | 70.40 $\pm$ 7.21 b  | 89.33 $\pm$ 3.44 a  | 72.48 $\pm$ 5.48 b  |
| total TL / total CHI <sup>1</sup> | AFerm   |                     | 1.42 $\pm$ 0.12     | 0.90 $\pm$ 2.03     | 1.13 $\pm$ 0.02     |
|                                   | ProStab | 1.01 $\pm$ 0.02 a   | 0.94 $\pm$ 0.04 a   | 1.02 $\pm$ 0.04 a   | 0.82 $\pm$ 0.08 b   |
| <i>SE-HPLC</i>                    |         |                     |                     |                     |                     |
| P93                               | AFerm   |                     | 3.94 $\pm$ 0.34     | 15.05 $\pm$ 13.26   | 13.38 $\pm$ 15.78   |
|                                   | ProStab | -6.41 $\pm$ 10.96   | 2.41 $\pm$ 2.81     | -29.95 $\pm$ 29.80  | -25.67 $\pm$ 24.76  |
| P67                               | AFerm   |                     | 38.57 $\pm$ 1.52    | 35.69 $\pm$ 6.04    | 60.24 $\pm$ 21.02   |
|                                   | ProStab | 88.57 $\pm$ 9.82    | 80.79 $\pm$ 7.15    | 93.74 $\pm$ 10.84   | 100.00 $\pm$ 0.00   |
| PR32                              | AFerm   |                     | 100.00 $\pm$ 0.00 a | 29.29 $\pm$ 8.81 b  | 100.00 $\pm$ 0.00 a |
|                                   | ProStab | 100.00 $\pm$ 0.00   | -                   | 100.00 $\pm$ 0.00   | -                   |
| PR25                              | AFerm   |                     | 52.52 $\pm$ 5.80 b  | 24.43 $\pm$ 1.32 c  | 73.59 $\pm$ 2.73 a  |
|                                   | ProStab | 88.55 $\pm$ 7.08 a  | 71.95 $\pm$ 4.63 b  | 89.94 $\pm$ 2.80 a  | 70.75 $\pm$ 7.46 b  |
| PR23                              | AFerm   |                     | 61.31 $\pm$ 5.36 b  | 29.87 $\pm$ 3.20 c  | 81.36 $\pm$ 4.73 a  |
|                                   | ProStab | 91.16 $\pm$ 5.54 a  | 79.96 $\pm$ 4.06 b  | 92.81 $\pm$ 3.17 a  | 75.32 $\pm$ 8.73 b  |
| PR22                              | AFerm   |                     | 82.18 $\pm$ 2.71 b  | 16.96 $\pm$ 5.58 c  | 92.76 $\pm$ 2.69 a  |
|                                   | ProStab | 92.05 $\pm$ 4.61 ab | 84.34 $\pm$ 4.71 b  | 98.94 $\pm$ 1.30 a  | 93.80 $\pm$ 6.18 a  |
| PR20                              | AFerm   |                     | 75.72 $\pm$ 1.19 a  | 22.06 $\pm$ 4.00 b  | 79.89 $\pm$ 4.07 a  |
|                                   | ProStab | 81.62 $\pm$ 1.43 a  | 51.50 $\pm$ 0.74 b  | 83.67 $\pm$ 1.28 a  | 19.65 $\pm$ 13.65 c |
| total PR                          | AFerm   |                     | 65.50 $\pm$ 3.99 b  | 23.96 $\pm$ 2.09 c  | 80.37 $\pm$ 3.34 a  |
|                                   | ProStab | 88.33 $\pm$ 4.90 a  | 71.61 $\pm$ 3.42 b  | 90.84 $\pm$ 1.59 a  | 61.06 $\pm$ 6.65 c  |

CO – control wine without bentonite or commercial enological tannin preparation added during fermentation, GSAB – initial dose (95 g/hL) of granular sodium-activated bentonite added near the end of fermentation, ET – commercial enological tannin preparation (25 g/hL divided in three portions) added during fermentation, GSAB + ET – initial dose (95 g/hL) of granular sodium-activated bentonite added near the end of fermentation and commercial enological tannin preparation (25 g/hL divided in three portions) added during fermentation. AFerm – wines analyzed after fermentation, ProStab – wines analyzed after total protein stabilization by additional post-fermentation fining with bentonite. AFerm reductions were calculated in relation to CO wine and ProStab reductions in relation to corresponding AFerm wines. Different lowercase letters in a row represent statistically significant differences among treatments, at  $p < 0.05$  obtained by one-way ANOVA and LSD test. <sup>1</sup> ratio of % values.

**Table S3.** Reduction of the concentrations of proteins in Malvazija istarska wines (mean  $\pm$  standard deviation; n = 3; %) obtained after partial fining with different types of bentonite in fermentation, and in final protein stable wines.

| Protein                           | Stage   | Treatment          |                     |                     |                     |                     |
|-----------------------------------|---------|--------------------|---------------------|---------------------|---------------------|---------------------|
|                                   |         | CO                 | GSAB                | PEN                 | MVN                 | PUR                 |
| <i>RP-HPLC</i>                    |         |                    |                     |                     |                     |                     |
| TL1                               | AFerm   |                    | 66.94 $\pm$ 2.24 c  | 74.72 $\pm$ 3.30 b  | 73.25 $\pm$ 1.86 b  | 94.16 $\pm$ 1.10 a  |
|                                   | ProStab | 95.76 $\pm$ 0.92 a | 88.65 $\pm$ 0.41 bc | 86.09 $\pm$ 1.44 bc | 89.47 $\pm$ 0.93 b  | 84.58 $\pm$ 3.56 c  |
| TL2                               | AFerm   |                    | 49.70 $\pm$ 3.21 b  | 48.83 $\pm$ 2.26 b  | 46.55 $\pm$ 2.87 b  | 73.95 $\pm$ 2.08 a  |
|                                   | ProStab | 93.18 $\pm$ 0.39 a | 87.07 $\pm$ 1.03 b  | 80.94 $\pm$ 3.79 c  | 84.61 $\pm$ 2.03 bc | 74.11 $\pm$ 2.7 d   |
| TL3                               | AFerm   |                    | 28.64 $\pm$ 5.21 b  | 13.35 $\pm$ 5.27 c  | 10.70 $\pm$ 4.31 c  | 49.28 $\pm$ 2.45 a  |
|                                   | ProStab | 88.43 $\pm$ 0.99 a | 84.23 $\pm$ 1.47 ab | 77.30 $\pm$ 5.15 b  | 80.74 $\pm$ 4.27 b  | 64.66 $\pm$ 2.45 c  |
| TL4                               | AFerm   |                    | 77.38 $\pm$ 1.20 b  | 96.83 $\pm$ 1.94 a  | 97.76 $\pm$ 0.34 a  | 98.49 $\pm$ 0.17 a  |
|                                   | ProStab | 97.27 $\pm$ 1.16   | 91.46 $\pm$ 0.57    | 91.49 $\pm$ 1.49    | 93.44 $\pm$ 1.59    | 95.54 $\pm$ 5.30    |
| CHI1                              | AFerm   |                    | 62.84 $\pm$ 3.22 c  | 70.30 $\pm$ 3.11 b  | 61.80 $\pm$ 3.30 c  | 83.41 $\pm$ 1.77 a  |
|                                   | ProStab | 94.97 $\pm$ 0.21 a | 88.70 $\pm$ 0.62 b  | 85.54 $\pm$ 1.85 b  | 88.52 $\pm$ 0.47 b  | 76.74 $\pm$ 3.62 c  |
| CHI2                              | AFerm   |                    | 63.13 $\pm$ 3.37 c  | 74.78 $\pm$ 3.09 b  | 66.61 $\pm$ 2.78 c  | 85.78 $\pm$ 1.44 a  |
|                                   | ProStab | 95.34 $\pm$ 0.30 a | 88.91 $\pm$ 0.74 b  | 85.18 $\pm$ 2.04 b  | 87.87 $\pm$ 0.47 b  | 77.69 $\pm$ 4.21 c  |
| total TL                          | AFerm   |                    | 64.87 $\pm$ 1.48 c  | 73.39 $\pm$ 2.32 b  | 72.52 $\pm$ 1.55 b  | 89.09 $\pm$ 1.00 a  |
|                                   | ProStab | 95.29 $\pm$ 0.77 a | 88.16 $\pm$ 0.66 b  | 82.45 $\pm$ 3.10 c  | 85.85 $\pm$ 1.80 bc | 73.56 $\pm$ 2.9 d   |
| total CHI                         | AFerm   |                    | 62.97 $\pm$ 3.29 c  | 72.30 $\pm$ 3.09 b  | 63.96 $\pm$ 3.07 c  | 84.47 $\pm$ 1.62 a  |
|                                   | ProStab | 95.14 $\pm$ 0.24 a | 88.79 $\pm$ 0.67 b  | 85.39 $\pm$ 1.90 b  | 88.25 $\pm$ 0.39 b  | 77.13 $\pm$ 3.86 c  |
| total                             | AFerm   |                    | 63.94 $\pm$ 2.36 c  | 72.86 $\pm$ 2.70 b  | 68.34 $\pm$ 2.14 c  | 86.84 $\pm$ 1.30 a  |
|                                   | ProStab | 95.22 $\pm$ 0.52 a | 88.48 $\pm$ 0.67 b  | 83.91 $\pm$ 2.47 c  | 87.18 $\pm$ 0.91 bc | 75.61 $\pm$ 3.39 d  |
| total TL / total CHI <sup>1</sup> | AFerm   |                    | 1.03 $\pm$ 0.03 b   | 1.02 $\pm$ 0.01 b   | 1.14 $\pm$ 0.04 a   | 1.05 $\pm$ 0.01 b   |
|                                   | ProStab | 1.00 $\pm$ 0.01    | 0.99 $\pm$ 0.00     | 0.97 $\pm$ 0.02     | 0.97 $\pm$ 0.02     | 0.95 $\pm$ 0.02     |
| <i>SE-HPLC</i>                    |         |                    |                     |                     |                     |                     |
| P93                               | AFerm   |                    | 20.00 $\pm$ 4.92    | 21.53 $\pm$ 11.26   | 24.96 $\pm$ 1.36    | 30.11 $\pm$ 5.22    |
|                                   | ProStab | 11.45 $\pm$ 17.63  | 4.28 $\pm$ 14.61    | 6.07 $\pm$ 10.06    | 5.47 $\pm$ 6.51     | 3.35 $\pm$ 9.35     |
| P67                               | AFerm   |                    | 10.23 $\pm$ 6.27 b  | 2.14 $\pm$ 6.70 b   | -2.16 $\pm$ 8.44 b  | 41.29 $\pm$ 3.74 a  |
|                                   | ProStab | 89.02 $\pm$ 0.36 a | 86.31 $\pm$ 0.05 a  | 81.33 $\pm$ 1.87 a  | 83.27 $\pm$ 3.82 a  | 68.53 $\pm$ 11.63 b |
| PR32                              | AFerm   |                    | 100.00 $\pm$ 0.00   | 100.00 $\pm$ 0.00   | 100.00 $\pm$ 0.00   | 100.00 $\pm$ 0.00   |
|                                   | ProStab | 100.00 $\pm$ 0.00  | -                   | -                   | -                   | -                   |
| PR25                              | AFerm   |                    | 52.71 $\pm$ 1.53 c  | 61.30 $\pm$ 4.12 b  | 58.52 $\pm$ 0.77 b  | 81.76 $\pm$ 1.21 a  |
|                                   | ProStab | 94.59 $\pm$ 0.66 a | 90.64 $\pm$ 1.52 ab | 86.10 $\pm$ 2.52 b  | 88.11 $\pm$ 1.23 b  | 75.06 $\pm$ 4.12 c  |
| PR23                              | AFerm   |                    | 61.07 $\pm$ 1.14 c  | 71.96 $\pm$ 2.96 b  | 71.21 $\pm$ 1.05 b  | 88.71 $\pm$ 0.57 a  |
|                                   | ProStab | 95.24 $\pm$ 0.01 a | 90.66 $\pm$ 1.54 a  | 87.46 $\pm$ 1.33 ab | 89.06 $\pm$ 1.33 a  | 80.45 $\pm$ 7.59 b  |
| PR22                              | AFerm   |                    | 68.60 $\pm$ 1.72 c  | 82.96 $\pm$ 3.33 b  | 82.99 $\pm$ 1.39 b  | 93.76 $\pm$ 0.47 a  |
|                                   | ProStab | 96.15 $\pm$ 0.58   | 89.18 $\pm$ 1.06    | 86.75 $\pm$ 1.82    | 89.45 $\pm$ 1.52    | 82.43 $\pm$ 8.46    |
| PR20                              | AFerm   |                    | 61.38 $\pm$ 2.45 d  | 71.46 $\pm$ 2.46 c  | 81.96 $\pm$ 0.15 b  | 93.57 $\pm$ 0.31 a  |
|                                   | ProStab | 96.15 $\pm$ 0.25 a | 91.18 $\pm$ 0.03 a  | 87.54 $\pm$ 1.85 a  | 86.37 $\pm$ 2.09 a  | 59.01 $\pm$ 10.96 b |
| total PR                          | AFerm   |                    | 59.20 $\pm$ 0.29 c  | 69.44 $\pm$ 3.23 b  | 69.87 $\pm$ 0.70 b  | 87.57 $\pm$ 0.72 a  |
|                                   | ProStab | 95.32 $\pm$ 0.18 a | 90.58 $\pm$ 1.24 ab | 86.73 $\pm$ 2.02 b  | 88.31 $\pm$ 1.31 b  | 75.65 $\pm$ 4.89 c  |

CO – control wine without bentonite in fermentation, GSAB – initial dose (95 g/hL) of granular sodium-activated CX Special Grain bentonite added near the end of fermentation, PEN – initial dose (95 g/hL) of Pentagel bentonite added near the end of fermentation, MVN – initial dose (143 g/hL) of Mastervin Compact bentonite added near the end of fermentation, PUR – initial dose (238 g/hL) of Siha Puranit bentonite added near the end of fermentation. AFerm – wines analyzed after fermentation, ProStab – wines analyzed after total protein stabilization by additional post-fermentation fining with granular sodium-activated CX Special Grain bentonite. AFerm reductions were calculated in relation to CO wine and ProStab reductions in relation to corresponding AFerm wines. Different lowercase letters in a row represent statistically significant differences among treatments, at  $p < 0.05$  obtained by one-way ANOVA and LSD test. <sup>1</sup> ratio of % values.

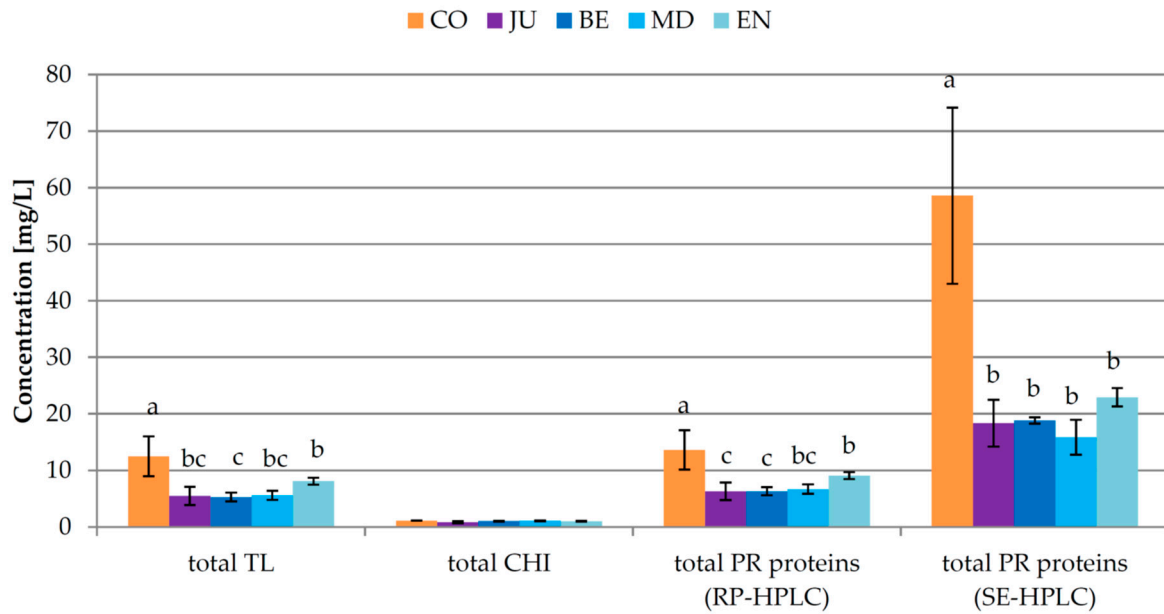

**Figure S1.** Total residual concentrations of pathogenesis-related (PR) proteins in protein stable Malvazija istarska wines (mean  $\pm$  standard deviation;  $n = 3$ ) obtained after partial fining with bentonite at different points of fermentation followed by additional fining by a required dose of granular sodium-activated bentonite after fermentation. CO – control wine without bentonite in fermentation, JU – initial granular sodium-activated bentonite dose added into clear juice, BE – initial granular sodium-activated bentonite dose added at the beginning of fermentation, MD – initial granular sodium-activated bentonite dose added in the middle of fermentation, EN – initial granular sodium-activated bentonite dose added near the end of fermentation. TL – thaumatin-like proteins, CHI – chitinases, RP-HPLC – reverse phase high-performance liquid chromatography, SE-HPLC – size exclusion high-performance liquid chromatography. Different lowercase letters above bars represent statistically significant differences among treatments with respect to total bentonite dose required, at  $p < 0.05$  obtained by one-way ANOVA and LSD test.

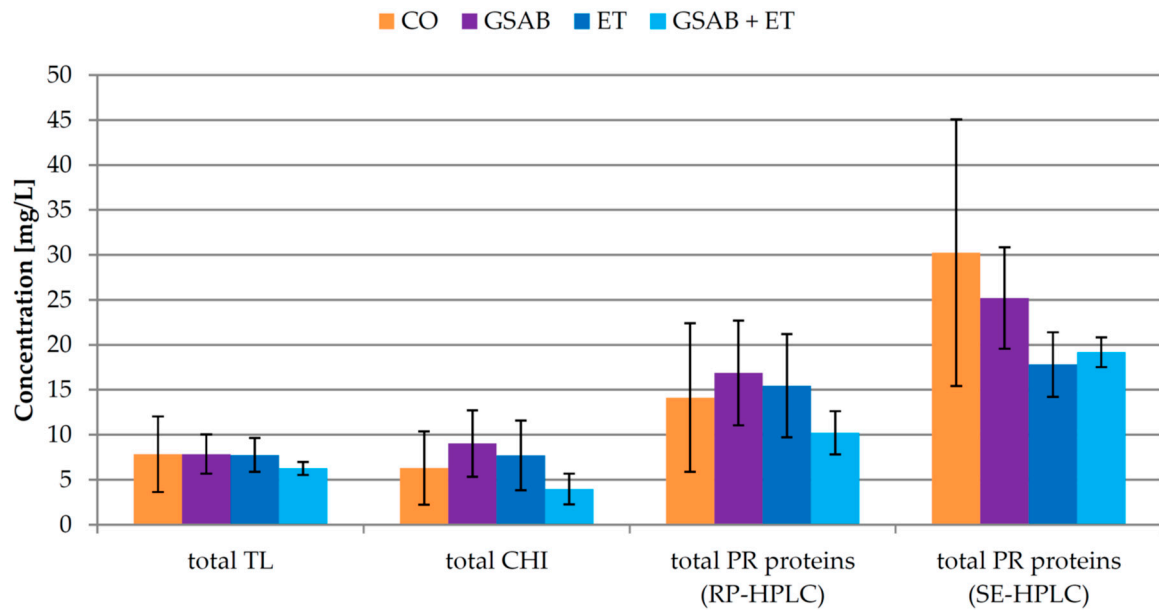

**Figure S2.** Total residual concentrations of pathogenesis-related (PR) proteins in protein stable Malvazija istarska wines (mean  $\pm$  standard deviation;  $n = 3$ ) obtained after partial fining with bentonite and/or the addition of commercial enological tannin preparation during fermentation followed by additional fining by a required dose of granular sodium activated bentonite after fermentation. CO – control wine without bentonite or commercial enological tannin preparation added during fermentation, GSAB – initial dose of granular sodium-activated bentonite added near the end of fermentation, ET – commercial enological tannin preparation added during fermentation, GSAB + ET – initial dose of granular sodium-activated bentonite added near the end of fermentation and commercial enological tannin preparation added during fermentation. TL – thaumatin-like proteins, CHI – chitinases, RP-HPLC – reverse phase high-performance liquid chromatography, SE-HPLC – size exclusion high-performance liquid chromatography. Different lowercase letters above bars represent statistically significant differences among treatments with respect to total bentonite dose required, at  $p < 0.05$  obtained by one-way ANOVA and LSD test,

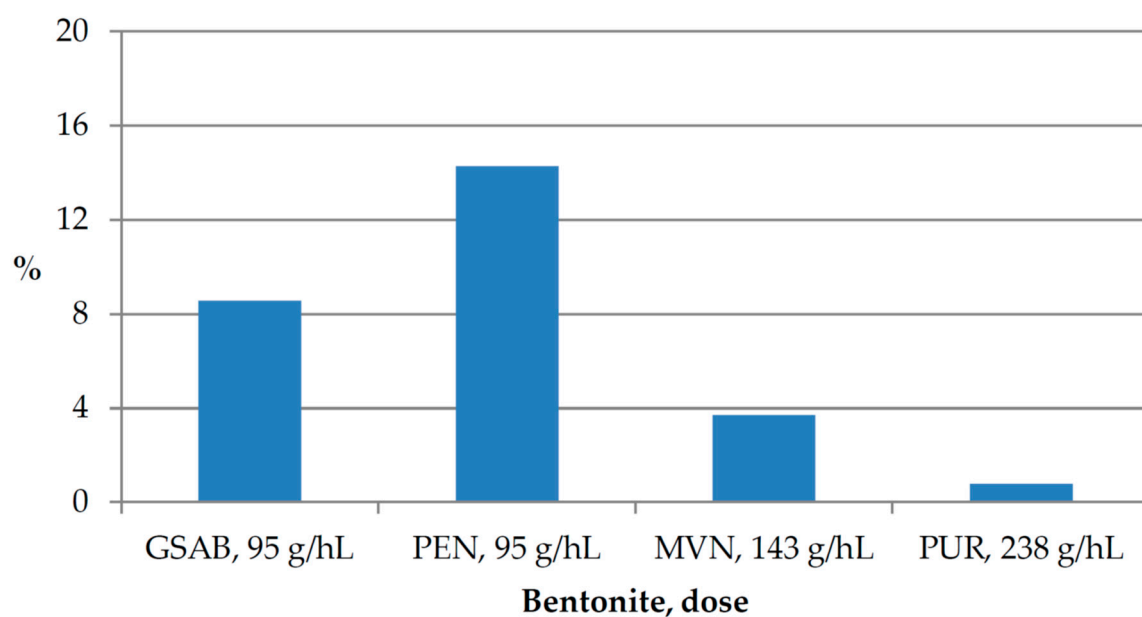

**Figure S3.** Percentage of bentonite sediment (%) after treatment of grape juice with a dose of 95 g/hL of granular sodium-activated bentonite and equivalent doses of other bentonites determined by a preliminary protein stability test. Abbreviations: GSAB - granular sodium-activated bentonite CX Special Grain, PEN - activated sodium bentonite Pentagel, MVN - activated sodium bentonite with specifically adsorbed silica and activated silica Mastervin Compact, PUR - active Na-Ca bentonite SIHA Puranit

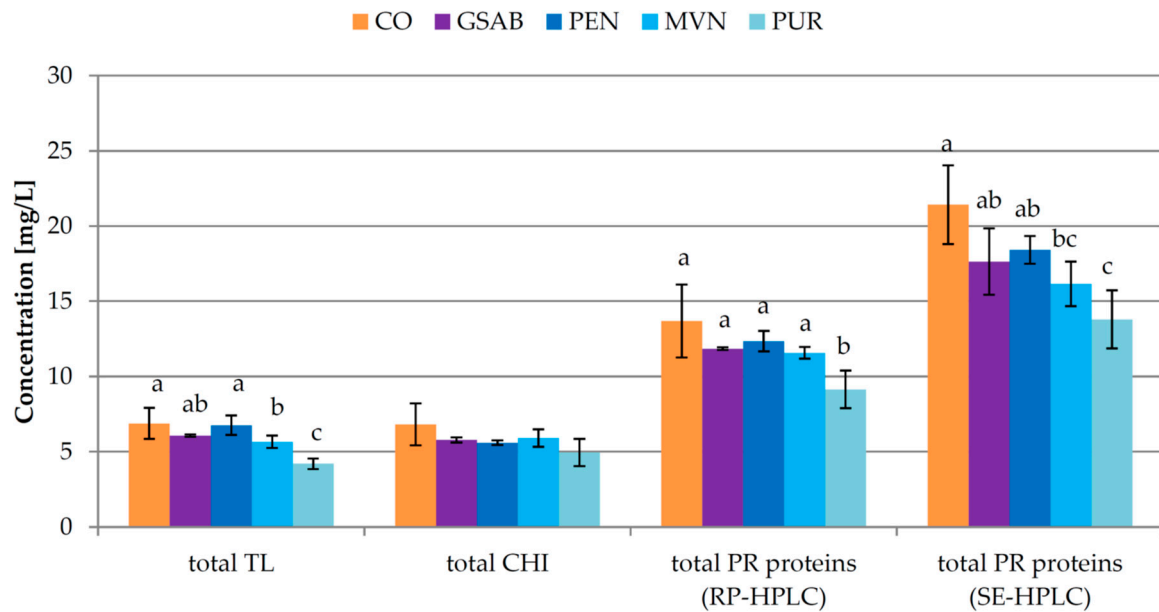

**Figure S4.** Total residual concentrations of pathogenesis-related (PR) proteins in protein stable Malvazija istarska wines (mean  $\pm$  standard deviation;  $n = 3$ ) obtained after partial fining with different types of bentonite in fermentation followed by additional fining by a required dose of granular sodium-activated bentonite after fermentation. CO – control wine without bentonite in fermentation, GSAB – initial dose (95 g/hL) of granular sodium-activated bentonite CX Special Grain added near the end of fermentation, PEN – initial dose (95 g/hL) of sodium-activated bentonite Pentagel added near the end of fermentation, MVN – initial dose (143 g/hL) of activated sodium bentonite with specifically adsorbed silica and activated silica Mastervin Compact added near the end of fermentation, PUR – initial dose (238 g/hL) of active Na-Ca bentonite Siha Puranit bentonite added near the end of fermentation. TL – thaumatin-like proteins, CHI – chitinases, RP-HPLC – reverse phase high-performance liquid chromatography, SE-HPLC – size exclusion high-performance liquid chromatography. Different lowercase letters above bars represent statistically significant differences among treatments with respect to total bentonite dose required, at  $p < 0.05$  obtained by one-way ANOVA and LSD test.
